# 1 Specificity and mechanism of 1,6 hexanediol-induced disruption of nuclear 2 transport

3 Elizabeth C. Riquelme Barrientos<sup>a</sup>, Tegan A. Otto<sup>a</sup>, Sara N. Mouton<sup>a</sup>, Anton Steen<sup>a</sup>, Liesbeth M.  
4 Veenhoff<sup>a</sup>

5 <sup>a</sup>European Research Institute for the Biology of Ageing, University of Groningen, University Medical  
6 Center Groningen, 9713 AV Groningen, The Netherlands

7

8 To whom correspondence should be addressed: l.m.veenhoff@rug.nl

9

10 Keywords: Nuclear Pore Complex, 1,6-hexanediol, Nuclear Transport Receptors, nuclear transport,  
11 aliphatic alcohol, liquid-liquid phase separation, baker's yeast.

12

## 13 **ABSTRACT**

14 Selective transport through the nuclear pore complex (NPC) depends on the dynamic binding of the  
15 intrinsically disordered components of the NPC, the FG-nups, with each other and with nuclear  
16 transport receptors (NTRs). Hydrophobic interactions with the phenylalanines of FG-nups are critical  
17 for this dynamic binding. 1,6-hexanediol (1,6HD), is an aliphatic alcohol that interferes with  
18 hydrophobic interactions. Here we assessed the specificity and mechanism by which 1,6HD disrupts  
19 the permeability barrier of NPCs in live baker's yeast cells. Exposure to 1,6HD (10 min, 0-5%) leads to  
20 gradual loss of the NPC permeability. This is likely a direct effect on the nuclear transport machinery  
21 as cell viability, the pH and ATP levels in the cytosol, as well as the appearance of mitochondria, Golgi,  
22 peroxisomes, ER, vacuoles, plasma membrane, nucleolus, secretory pathway and stress granules are  
23 not notably changed. There are however effects on the cytoskeleton and Hsp104 to be noted. While  
24 1,6HD treatment does not lead to dissociation or degradation of NPC subunits, a massive relocation  
25 of multiple NTRs from NPCs does occur. This displacement quantitatively correlates with the increased  
26 passive permeability of NPCs. The loss of NTRs and associated cargo will present a major change in the  
27 macromolecular crowding and composition and hence the physicochemical properties of the central  
28 channel. We conclude that 1,6HD provides a surprisingly specific intervention to temporarily  
29 permeate NPCs and we present evidence that the mechanism includes release of NTRs from the NPCs.

30

31

32

## 33 INTRODUCTION

34 The Nuclear Pore Complex (NPC) is the sole gate between the nucleus and cytosol. The central channel  
35 of NPCs is lined with intrinsically disordered phenylalanine-glycine rich nucleoporins, the FG-nups, and  
36 it hosts many nuclear transport receptors (NTRs) (Dultz et al. 2022; Hampoelz et al. 2019; Wing, Fung,  
37 and Chook 2022; Fernandez-Martinez and Rout 2021). The NTRs bind their cargo and shuttle them  
38 through the channel by transiently binding the FG-nups (Paci, Caria, and Lemke 2021; Wing, Fung, and  
39 Chook 2022; Bayliss, Littlewood, and Stewart 2000). For the NTR Importin $\beta$  it was shown that besides  
40 a fraction that is shuttling cargo between the cytoplasm and nucleus, there is also a fraction that is  
41 more stably associated with NPCs (Lowe et al. 2015; Kapinos et al. 2014). In addition to NTRs also  
42 cargo and non-cargo are present in the NPC. In isolated yeast NPCs, 15,6 MDa worth of NTRs and 10,4  
43 MDa worth of cargo add significantly to the 52,3 MDa mass of actual NPC subunits (Kim et al. 2018).  
44 The central channel of the nuclear pore complex is thus a highly crowded and complex environment  
45 where the joint presence of NTRs, FG-nups and cargo creates an environment that allows fast and  
46 selective transport.

47 The exact structure of the central channel has remained elusive because experimentally probing its  
48 behaviour in living cells is challenging. Our knowledge about the behaviour of the FG-nups and NTRs  
49 is inferred from, amongst others, imaging detergent-perforated or live cells (Chowdhury, Sau, and  
50 Musser 2022; Schnell, Tingey, and Yang 2022; Mattheyses et al. 2010; Yu et al. 2022), AFM  
51 measurements on nuclear envelopes (Sakiyama et al. 2016), transport measurement in biomimetic  
52 NPCs (Jovanovic-Talisman et al. 2009; Fisher et al. 2018; Kowalczyk et al. 2011), surface anchored FG-  
53 nups (Kapinos et al. 2014) or from probing the structural conformation of purified FG-nups or FG-nup  
54 fragment preparations (Frey, Richter, and Görlich 2006; Celetti et al. 2020; Ader et al. 2010; Hayama  
55 et al. 2018; Sparks et al. 2018). These experimental studies, together with computational strategies  
56 (Davis, Ford, and Hoogenboom 2022; Zheng and Zilman 2023; Isgro and Schulten 2007; Popken et al.  
57 2015; Ghavami et al. 2014), have resulted in a number of models explaining the fast and selective  
58 transport through the NPC (Dultz et al. 2022; Hampoelz et al. 2019; Wing, Fung, and Chook 2022;  
59 Fernandez-Martinez and Rout 2021; Hoogenboom et al. 2021; Huang and Szleifer 2020). All models  
60 agree that the phenylalanines of the FG-repeat regions that are engaging in hydrophobic interactions,  
61 as well as the intrinsically disordered nature of the FG-nups, are key parameters. They enable the  
62 highly dynamic intra- and inter-chain hydrophobic interactions between FG-repeat regions and with  
63 the hydrophobic grooves on the surfaces of NTRs. In the Kap-centric models the slow exchanging pool  
64 of NTRs are proposed to be important to create the proper barrier function (Kapinos et al. 2017; Kalita  
65 et al. 2022; Fragasso et al. 2022).

66 Early experiments using aliphatic alcohols pointed to the importance of hydrophobic interactions for  
67 import into nuclei of permeabilized cells (Ribbeck and Görlich 2002) and in live yeast cells (Shulga and  
68 Goldfarb 2003). Early experiments in permeabilized HeLa cells showed that selective transport of  
69 fluorescent reporters (MBP or IBB-MBP) was abrogated in the presence of hexane-1,2-diol but not by  
70 the less hydrophobic hexane-1,2,3-triol (Ribbeck and Görlich 2002). In live yeast cells it was observed  
71 that the nuclear accumulation of GFP fused to a classical nuclear localisation signal (NLS) was lost upon  
72 addition of alcohols and the extend of equilibration was dependent on the hydrophobicity of the  
73 alcohol (Shulga and Goldfarb 2003). Biochemical studies using purified FG-repeat fragments show that  
74 some of them are cohesive and that their interactions are disrupted by 1,6HD (Patel et al. 2007;  
75 Schmidt and Görlich 2015). Also, within the yeast cytosol such overexpressed fragments form foci that  
76 are dispersed by 1,6HD (Patel et al. 2007). Lastly, 1,6 HD was shown to increases the diameter of NPCs  
77 in *Xenopus* oocyte nuclear envelope preparations (Jäggi et al. 2003). Most dramatically, in the context  
78 of mutant NPCs that lack the inner ring nucleoporins Nup170 or Nup188, 1,6HD can even lead to loss  
79 of FG-nups from these NPCs (Shulga and Goldfarb 2003; Onischenko et al. 2017). The effect of  
80 hexanediol in the above studies was attributed to a reversible disruption of inter-FG repeat cohesion.  
81 However, as also the interactions between NTRs and FG-nups are based on hydrophobic interactions,  
82 hexanediol will likely also take effect here. Illustrative for the high surface hydrophobicity of NTRs, is  
83 their strong binding to a phenyl sepharose chromatography column yielding highly enriched fractions  
84 from HeLa cell extracts (Ribbeck and Görlich 2002). Jointly these studies support the importance of  
85 hydrophobic interaction for nuclear transport, and the potential of 1,6 HD to disrupt those.

86 Unrelated to nuclear transport, 1,6HD has also been widely used to dissolve liquid-liquid phase  
87 separated compartments in cells and to dissolve condensates in *in vitro* studies. With aggregation-  
88 prone peptides, the alcohol dissolves hydrogels (Molliex et al. 2015; Kroschwald, Maharana, and  
89 Simon 2017; Shi et al. 2017) but not fibers (Lin et al. 2016; Van Lindt et al. 2022). In cells, the  
90 interpretation of effects of 1,6HD are more difficult (Kroschwald, Maharana, and Simon 2017) and  
91 depending on the cell type, growth condition and the concentration and length of treatment different  
92 results may be obtained. There are many examples of discrepancies in the literature; only one example  
93 is the organization of actin and tubulin. While some reports show that they are affected by 1,6HD  
94 (Wheeler et al. 2016; Kroschwald, Maharana, and Simon 2017), others report that microtubules are  
95 unaffected (Lin et al. 2016).

96 From the above, the question arises how specific the effects of 1,6HD on nuclear transport are and,  
97 whether they are based on a loss of cohesion between the FG-repeat regions, or between FG-nups  
98 and NTRs, or both. Here, we probe the impact of 1,6HD on nuclear transport by measuring the effects  
99 on passive transport, on NTR-facilitated import and export, and on the cellular localisation of Nups

100 and NTRs. We also assess a large number of possible indirect effects of 1,6HD, namely cell viability,  
101 the pH and ATP levels in the cytosol, and the appearance of mitochondria, Golgi, peroxisomes, ER,  
102 vacuoles, plasma membrane, nucleolus, secretory pathway, stress granules, the cytoskeleton and  
103 Hsp104 foci. Our data support that 1,6HD provides a surprisingly specific intervention to temporarily  
104 increase the passive permeability of NPCs by the release of NTRs from the NPC.

105

## 106 **RESULTS**

### 107 **Disruption of the permeability barrier of NPCs by 1,6 hexanediol**

108 Previous reports already showed that 1,6HD disrupts the permeability barrier of NPCs in yeast cells  
109 (Shulga and Goldfarb 2003; Patel et al. 2007). We add to this work and provide a quantitative  
110 assessment of the impact of 1,6HD on passive nuclear entry of large reporters and NTR-mediated  
111 transport of GFP-NLS and GFP-NES reporters in yeast. To assess passive nuclear entry, the MG5  
112 reporter, composed of a Maltose Binding Protein and 5 GFPs is used. MG5 has a molecular weight of  
113 177 kDa and is excluded from the nucleus in wild type cells (Popken et al. 2015). Mid exponential  
114 growing cells were exposed for 10 minutes to zero, 0.625, 1.25, 2.5 or 5% 1,6HD, or to the less  
115 hydrophobic alcohol 2,5 hexanediol (2,5HD). The steady state distribution of the GFP-reporters was  
116 calculated by taking the ratio of the fluorescence measured in the nucleus and the cytosol (the N/C  
117 ratio). The permeability of the NPCs for entry of MG5 increased gradually with increasing  
118 concentrations of 1,6HD (Fig 1A) indicating that NPCs became more permeable for this large protein.  
119 1,6HD had a stronger effect on the passive permeability of NPCs than 2,5HD, as MG5 remains properly  
120 excluded from the nucleus, even at a concentration of 5% 2,5HD (Fig 1A).

121 To assess active import and export, GFP with a classical NLS (GFP-cNLS) and GFP-NES reporters are  
122 used. The balance between Kap60/Kap95-facilitated import of GFP-cNLS and its passive efflux leads  
123 to nuclear accumulation. Similarly, the balance of CRM1-facilitated export of GFP-NES and its passive  
124 influx leads to a steady-state nuclear exclusion. The import and export reporters showed a gradual  
125 decline in nuclear accumulation and exclusion, respectively, with increasing 1,6HD concentrations (Fig  
126 1B,C). This loss of nuclear compartmentalisation could solely be the consequence of the increased  
127 passive permeability (Fig 1A), but could additionally be the result of a decrease in the active transport  
128 rates. As for passive transport 1,6HD had a stronger effect for active transport than 2,5HD, as higher  
129 concentrations of 2,5HD were needed to decrease the compartmentalisation of GFP-NLS and GFP-NES  
130 (Fig 1B,C). From this we conclude that exposure of live yeast cells to 1,6HD (10 min, 0-5%) leads to a  
131 gradual loss of the permeability barrier of NPCs.

132

### 133 **On the specificity of 1,6HD towards disrupting nuclear transport**

134 The question if the increased NPC permeability after exposure to 1,6HD is a direct consequence of an  
135 altered nuclear transport system, or rather a consequence of indirect effects on the cell's physiology,  
136 is pertinent. Indeed, depending on the exposure time and concentration 1,6HD may well have  
137 pleiotropic effects in cells, as also previously discussed (Kroschwald, Maharana, and Simon 2017).  
138 Using the set concentration of 5% 1,6HD, we assessed all aspects of cell physiology that we deemed  
139 relevant and could assess. First, we treat the cells for 10 or 30 min with 5% 1,6HD or 2,5HD and  
140 observed no effects on cell viability (Fig 2A). Then, we assessed if 10 min exposure to 5% 1,6HD leads  
141 to changes in free ATP levels or cytosolic pH, using fluorescence-based sensors (Imamura et al. 2009;  
142 Miesenböck, De Angelis, and Rothman 1998). Our rationale for testing these was that ATP and pH  
143 levels could change when cells are experiencing metabolic stresses. We find, however, that the levels  
144 of free ATP are unchanged after 1,6HD treatment. As a control, sodium azide (NaN<sub>3</sub>) and 2-deoxy-  
145 glucose (2DG) were used, which both depleted the cell of energy (Fig 2B). The cytosolic pH values,  
146 calibrated as described in (Mouton et al. 2020), decrease mildly from 7.2 to 6,8 or 6,7 after exposure  
147 to 1,6HD and 2,5HD respectively, and therefore remain in the physiological range (Fig 2C).

148 Next, we looked at the morphology and localization of different subcellular structures using GFP- or  
149 RFP-tagged proteins marking the mitochondria, Golgi, peroxisome, ER, vacuole, plasma membrane,  
150 nucleolus, secretory pathway, and ESCRT machinery. From visual inspection we conclude there are no  
151 obvious changes in their appearance after 10 min exposure to 5% 1,6HD (Fig 2D). In contrast, the  
152 appearance of microtubules and actin filaments does change after treatment with 1,6HD, which aligns  
153 with some previous literature (Wheeler et al. 2016; Kroschwald, Maharana, and Simon 2017). Hsp104,  
154 a disaggregase that can refold and reactivate previously aggregated proteins and responds to alcohol-  
155 stress (Bösl, Grimminger, and Walter 2006; Sanchez and Lindquist 1990; Glover and Lindquist 1998;  
156 Harari et al. 2022), forms foci upon exposure to 1,6HD, similar to when cells are exposed to either  
157 nitrogen starvation, energy depletion or heat shock (Fig 2E), suggesting that 1,6HD induces some level  
158 of protein stress. Finally, 1,6HD does not induce the formation of p-bodies (Fig 2F) or stress granules  
159 (Fig 2G).

160 Taking the above together, under the conditions where mid exponentially growing cells are exposed  
161 to 5% 1,6HD for 10 min, there are effects on the cytoskeleton and Hsp104 to be noted, but cell viability,  
162 the pH and ATP levels in the cytosol, and the appearance of mitochondria, Golgi, peroxisomes, ER,  
163 vacuoles, plasma membrane, nucleolus, the secretory and ESCRT pathways and stress granules are  
164 not notably changed. While this is not an absolute proof of absence of indirect effects on nuclear

165 transport, the data strongly suggest that the 1,6HD-dependent effects on NPC permeability shown in  
166 Fig 1 is due to direct effects on the nuclear transport machinery. Exposure to 10 min 5% 1,6HD thus  
167 permeabilizes NPCs with surprising specificity.

168

### 169 **1,6HD induced loss of NTRs from the NPCs disrupts the permeability barrier**

170 Previous work proposed that the effects of 1,6HD are related to the alcohol-sensitive hydrophobic  
171 interactions between the FG-nups that maintain the permeability barrier (Patel et al. 2007; Ribbeck  
172 and Görlich 2002; Schmidt and Görlich 2015). Indeed, when the FG-domains of Nup100 (Nup100FG)  
173 in preformed condensates are exposed to the concentrations of 1,6HD that were also used in life cells  
174 (0-5%), partial solubilisation of the condensates is observed (Sup fig 1). While disruption of FG-nup  
175 interactions by 1,6HD is indeed a scenario that is supported by *in-vitro* data, it is also one that is not  
176 easy to proof or disproof in *in vivo* experiments. Alternative or additional explanations for the  
177 increased permeability of NPCs in 1,6HD treated cells that can be experimentally addressed, relate to  
178 the composition of the NPCs and to the NTRs. We explore them both.

179 Previous work (Shulga and Goldfarb 2003) showed that 1,6HD did not lead to release of NPC  
180 components in wild type W303 cells, but it did in a mutant lacking Nup170. We noticed that even in  
181 wild type cells the exposure to 10% 1,6HD lead to release of NPC components (data not shown).  
182 Therefore, we repeated the analysis of nup localisation, and expanded on it with an analysis of  
183 proteins levels. We assessed the effects of 5% 1,6HD on the protein levels and NPC-association of nine  
184 representative endogenously tagged nups. The five tested FG-nups (Nsp1, Nup49, Nup159, Nup100,  
185 Nup116), two of the scaffold nups (Nup133 and Nup170) and two basket nups (Nup60 and Nup2) did  
186 not show changes in expression levels by western blot (Fig 3B). Also, their localization to the nuclear  
187 envelope was unchanged, consistent with (Shulga and Goldfarb 2003) (Fig 3B). We conclude that the  
188 10 minutes 1,6HD treatment did not lead to dissociation or degradation of the tested NPC  
189 components, and hence it is unlikely that the increased permeability is a result of changes to the Nup-  
190 composition of the NPCs.

191 NPCs constitute a significant amount of NTRs at any point in time and their presence critically shapes  
192 the permeability barrier (Jovanovic-Taliman et al. 2009; Kalita, Kapinos, and Lim 2021; Lowe et al.  
193 2015; Kim et al. 2018). Therefore, we addressed the localisation and abundance of endogenously GFP-  
194 tagged NTRs after treatment with 1,6HD. The interaction between the FG-nups and NTRs are based  
195 on dynamic multivalent binding with the phenylalanine's of the FG-nups (Hoogenboom et al. 2021;  
196 Hough et al. 2015; Milles et al. 2015; Hayama et al. 2018; Sparks et al. 2018; Wing, Fung, and Chook

2022) and will thus also be sensitive to interventions disrupting hydrophobic interaction. We  
evaluated the localisation of endogenously GFP-tagged NTRs. Under normal conditions most NTRs are  
enriched at the nuclear envelope (NE) showing a punctate rim staining, e.g., Kap109, and few are  
enriched in the nucleus, e.g. Kap104 (Fig 4A). Strikingly, the exposure to 1,6HD led to a clear  
relocalisation of NTRs (Fig 4A). Kap104, Sxm1 (Kap108), Kap114, Nmd5 (Kap119), Pse1 (Kap121),  
Kap122 and Kap123 lose their accumulation at the NE or nucleus upon exposure to 1,6HD and  
distribute over the cytosol and nucleus (Fig 4A). Cse1 (Kap109), Kap120, Crm1 (Kap124) and Msn5  
(Kap142) which are normally enriched at the NE, partly relocate. Kap60 and Kap95 were not visibly  
affected by the treatment probably related to the previously described immobile pool of Kap95 at  
NPCs (Lowe et al. 2015). Kap60 and Kap95 remain at NPCs while GFP-cNLS, whose active import is  
driven by Kap60-Kap95, loses nuclear accumulation (Fig 1B), suggesting that 1,6HD treatment  
increases passive permeability. When the less hydrophobic alcohol 2,5HD was used, it led to some  
NTRs losing their accumulation at the NE or nucleus, but always to a lesser extent compared to 1,6HD  
(Sup Fig 2). We conclude that the massive relocation of NTRs from NPCs may mechanistically explain  
the 1,6HD induced increase in the permeability of NPCs.

To further strengthen this interpretation, we sought to quantitatively correlate the concentration  
dependent NTR relocalisation, with the 1,6HD concentration dependent entry of the reporters used  
before: MG5 (Fig 1A), GFP-NLS (Fig 1B) and GFP-NES (Fig 1C). We chose Kap122 for this analysis as  
Kap122 clearly loses its accumulation at the NE and distributes over the cytosol and nucleus (Fig 4A).  
The localisation of endogenously tagged Kap122-GFP in the nucleus and NE was assessed in a strain  
co-expressing endogenously tagged Nup133-mCherry to mark the NE. The average nuclear  
accumulation of Kap122 gradually decreased from 4,3 to 3,8 to 3,1 to 2,6 to 1,6 upon exposure to  
zero, 0.625, 1.25, 2.5 or 5% 1,6HD. Moreover, we could correlate Kap122 relocalisation from the  
nuclear envelope (NE) under these conditions with the measured passive permeability of NPCs for  
MG5 (Fig 4C), GFP-NLS (Fig 4C) and GFP-NES (Fig 4D) with a Pearson correlation coefficient of 0.9, 0.8  
and 0.9 respectively. These correlations support that 1,6HD perturbs the NPC permeability barrier by  
releasing the NTRs.

224

## 225 **DISCUSSION**

226 Here we assessed the specificity and mechanism by which 1,6-hexanediol (1,6HD), an aliphatic alcohol  
227 that interferes with hydrophobic interactions, disrupts the permeability barrier of NPCs in live baker's  
228 yeast cells. Exposure of live yeast cells to 1,6HD (10 min, 0-5%) leads to a gradual loss of the  
229 permeability barrier of NPCs. We conclude this is likely a direct effect on the nuclear transport

230 machinery as cell viability, the pH and ATP levels in the cytosol, and the appearance of mitochondria,  
231 Golgi, peroxisomes, ER, vacuoles, plasma membrane, nucleolus, secretory pathway and stress  
232 granules were not notably changed. There were effects on the cytoskeleton and protein homeostasis  
233 (Hsp104 foci) to be noted and we cannot exclude that 1,6 HD impacts the cell's physiology in ways  
234 that we did not monitor. Mechanistically we propose that the displacement of NTRs from the NPC  
235 underlies the loss of NPC function because 1,6HD treatment induced a massive relocation of multiple  
236 NTRs from NPCs. This displacement from the nuclear envelope quantitatively correlated with the  
237 passive permeability of NPCs.

238 Our studies align well with previous reports that showed that the selective properties of the FG-nups  
239 rely on the physical presence of NTRs within the NPC. The earliest study is one showing that the  
240 presence of transport factor enhances the selectivity of FG-nucleoporin-coated membranes  
241 (Jovanovic-Taliman et al. 2009). The most recent reports on detergent-permeabilized human cells  
242 show that the enrichment of NTRs at the NPCs is important for the permeability barrier by preventing  
243 passive permeability (Kalita et al. 2022). Our work adds to this by showing the importance of NTRs in  
244 live cells. The benefit being that in live cells there is a constant and large flux of transport and  
245 therefore, together with the loss of the estimated 15,6 MDa of NTRs from the central channel also  
246 10,4 MDa worth of cargo is being lost (Kim et al. 2018). This joint loss of NTRs *and* cargo from the NPC  
247 central channel will present a major change in the macromolecular crowding and composition, and  
248 hence its physicochemical properties. How this alters the structural dynamics of the FG-nups, and if  
249 this poses a risk for NPC function would be interesting questions for the future.

250 Extrapolating from studies using purified FG-nup fragments that proposed that the effects of 1,6HD is  
251 related to the alcohol-sensitive hydrophobic interactions between the FG-nups (Patel et al. 2007;  
252 Ribbeck and Görlich 2002; Schmidt and Görlich 2015) one may expect that 1,6HD also alters the  
253 interactions between the FG-nups in our assays using live cells. This is, however, difficult to address in  
254 live cells. Hence it remains unclear if the NTRs are released from the NPCs as a consequence of a  
255 lowered binding affinity between FG-nups, or because 1,6HD directly lowered the binding affinity of  
256 NTRs for the FG-repeat regions. If one considers that the functional composition of central channel is  
257 a system composed of NTRs *and* FG-nups in close collaboration, then the discrimination between  
258 these scenarios becomes less important.

259 An unanswered question in the field is if NPCs that are dysfunctional can be detected and removed.  
260 To assess this question, one needs to be able to inducibly damage NPCs. NPC permeabilization is  
261 expected to be an intervention that triggers quality control similar to when assembly fails (Thaller et



262 al. 2019; Webster et al. 2016; Thaller et al. 2021). The here described method could provide a tool to  
263 study the recruitment of quality control factors and to follow the repair or degradation.

264 Lastly, our study may serve as a warning that the effects of 1,6HD on liquid-liquid phase separation of  
265 diverse cellular macromolecular complexes may actually be the consequence of to 1,6HD's prime  
266 effect on the NPC and cognate NTRs. We speculate that the hydrophobic and highly acidic nature of  
267 NTRs may readily compromise their stability above a critical concentration. Consistent with this is that  
268 overexpression of Sxm1, Kap95, and Kap114 is toxic to cells (Simmelink et al. 2022). In any case, a  
269 major misplacement of NTRs and associated cargo will dramatically change the nuclear and  
270 cytoplasmic proteomes and this may generally compromise their stability. The increase in the number  
271 of Hsp104 foci that we observe may indeed reflect such loss of protein homeostasis.

272 Altogether, this paper puts hydrophobic interactions between NTRs and FG-Nups centre stage in the  
273 explanation of the selective properties of NPCs supporting the Kap-centric model for nuclear transport  
274 proposed by the Lim laboratory (Springhower, Rosen, and Chook 2020).

275

## 276 **MATERIAL AND METHODS**

### 277 **Strains and Growth conditions**

278 All *Saccharomyces cerevisiae* strains used in this study have the BY4741 background, except yER016,  
279 which were created in the W303 background. Strains are listed in Table 2. yER016, yER020 and yER023  
280 were created as described in (Janke et al. 2004). GFP-tagged strains were taken from the 4000-GFP  
281 yeast library (Thermofisher), RFP-tagged strains were taken from the localization database collection  
282 (Huh et al. 2003).

283 Cells were grown at 30°C, with shaking at 200 RPM on Synthetic Complete (SD) medium supplemented  
284 with 2% (w/v) glucose. Cells from an overnight culture were diluted 1:10 during the day and then again  
285 for an overnight culture in SD- 2% glucose. Cells were diluted again on the day of the experiment, and  
286 grown for several hours to obtain cultures in exponential growth phase ( $OD_{600}$  0.6-0.8) before each  
287 experiment.

### 288 **Spot assay**

289 On the day of the experiment, exponentially growing cells were treated with 5% 1,6HD or 5% 2,5HD  
290 for 10 or 30 minutes, as indicated in Fig. 2A, and diluted in sterilized milliQ water to obtain  $10^6$  cells/ml,  
291 and further serial diluted in milliQ water. 5 $\mu$ l of each dilution was spotted on YPD plates and the plates  
292 were imaged after 48H growth at 30°C.

## 293 **Microscopy**

294 All *in vivo* experiments were performed at 30°C. Images were acquired using a DeltaVision Elite  
295 imaging system (Cytiva) composed of an inverted microscope (IX-71; Olympus) equipped with a  
296 UPlanSApo 100x (1.4 NA) oil immersion objective, InsightSSI solid-state illumination, and an EDGE  
297 sCMOS 5.5 camera. For all experiments, stacks of 30 images with 0.2µm spacing were taken.

## 298 **Protein lysate and Western Blot**

299 20 ml of yeast culture was grown to an OD<sub>600</sub> 0.8-1.2. Cells were subsequently treated with 5% 1,6HD  
300 for 10 min at 30°C, with shaking at 200 RPM. After the treatment, cells were centrifuged, and all the  
301 following steps were performed at 4°C. The cell lysate was resuspended in 0.25ml of lysis buffer  
302 (50mM HEPES, 200mM sodium acetate, 1mM EDTA, 5mM magnesium acetate, 5% glycerol, 1% triton  
303 x-100, 10mM β-mercaptoethanol, protease inhibitor without EDTA) and lysed in two rounds of bead-  
304 beating in a Fastprep device (MP biomedical). Lysates were cleared by consecutive centrifugations at  
305 6000 x g for 5 min, followed by centrifugation of the supernatant at 17700 x g for 5 min. The resulting  
306 supernatant was centrifuged once more at 17700 x g.

307 Western blots were performed as follows: whole cell lysates were separated by SDS-PAGE. The  
308 proteins were subsequently transferred to PVDF membranes. After blocking with 5% skim milk in TBS-  
309 T, GFP-tagged proteins were detected with anti-GFP (Santa Cruz sc-9996 HRP) was used, followed by  
310 HRP-conjugated mouse IgG kappa binding protein (Santa Cruz sc-516102, m-igGκ BP-HRP).

## 311 **Expression and purification of nucleoporin FG-domains**

312 Nup100FG domains were expressed and purified as described in (Kuiper et al. 2022). In short: FG-  
313 domains proteins with an N terminal His-tag and a unique C-terminal cysteine were expressed in  
314 *Escherichia coli*, by induction with 0.5mM IPTG and purified from cell extracts on a Nickel-Sepharose  
315 column under denaturing conditions (2M GuHCl, 100mM Tris-HCl pH 8). The C-terminal cysteine was  
316 reduced with DTT and blocked by modification with Iodoacetamide. Protein purity was checked with  
317 SDS-PAGE and subsequent Brilliant Blue staining.

## 318 **Spin Assay**

319 A concentrated stock of 100µM Nup100FG domains in 2M GuHCl, 100mM Tris-HCl pH 8, was diluted  
320 to 3µM into TBS (50mM Tris-HCl, 150mM NaCl pH 8). The protein was left to self-assemble into  
321 particles for 1h at RT, and then the protein was treated for 10 min with different concentrations of  
322 1,6HD. Samples were centrifuged (17.700 x g for 10 min at RT), and soluble and insoluble fractions  
323 were run separately on SDS PAA gels. Gels were stained with Brilliant Blue G (Sigma-Aldrich, G-250)

324 and imaged using a BioRad chemidoc (BioRad). Band intensities were determined using Fiji (Image J,  
325 National Institute of Health).

### 326 **Determining the intracellular pH with the pFluorin sensor**

327 pFluorin ratios were calibrated in live cells in buffers with a pH of 5, 5.5, 6, 6.5, 7, 7.5, and 8, as  
328 described in (Mouton et al. 2020). The FRET/CFP and FRET/mEGFP (F390/F475) ratios were  
329 determined from cells on a glass slide. Cells were then treated with 1,6HD as described in Fig 2, and a  
330 calibration curve was used to determine the pH change after treatment.

### 331 **ATP sensor values and free ATP levels**

332 Cells expressing a FRET-based ATP sensor (Semmelink et al. 2022), were used to determine free ATP  
333 levels as described in (Semmelink et al. 2022). Cells were treated as described in Fig 2, imaged, and  
334 the FRET over GFP ratio was calculated using Fiji (see below).

### 335 **Image Analysis**

336 All images were processed using Fiji (Image J, National Institute of Health). For each image, the z-stack  
337 with the best focus was selected. For GFP-tagged reporters, we determined the fluorescence around  
338 the nuclear envelope and subtracted the background from outside the cell. For pFluorin and the ATP  
339 sensor, we determined the fluorescence in each channel for each cell and took the fluorescence of the  
340 entire cell and subtracted the background from a region outside the cell for each channel. The  
341 respective ratios were subsequently calculated. To quantify the nuclear localization (N/C ratio) of the  
342 GFP-based reporters and Kap122, the average fluorescent intensity of the nucleus and the cytosol was  
343 measured. The nucleus area was determined using either the mCherry-TM reporter (pACM063) that  
344 indicated the nuclear envelope (Fig 1) or Nup133-mCherry (Fig 4B). A section of the cytosol excluding  
345 the vacuole was selected to measure the fluorescence in the cytosol.

### 346 **Statistical Analysis**

347 Statistical parameters, including the number of cells analyzed, are reported in figure legends. All  
348 regressions and correlations leading to the sigmoidal curve equation,  $R^2$ , and all Pearson's correlation  
349 statistics were done in GraphPad Prism.

350

### 351 **ACKNOWLEDGEMENTS**

352 ERB and TO are supported by PhD-fellowships from the Graduate School of Medical Sciences of the  
353 University of Groningen. ERB, AS, LMV, are supported by a Vici grant (VI.C.192.031) from the

354 Netherlands Organisation for Scientific Research. We want to thank Amarins Blaauwbroek for practical  
355 assistance.

#### 356 **AUTHOR CONTRIBUTIONS**

357 ERB and LMV conceived the project. ERB designed, performed and analysed all experiments with help  
358 from SNM (Fig. 2BC) and TO (Supfig1). The manuscript was written by ERB and LMV with input of all  
359 authors.

360

#### 361 **COMPETING INTERESTS**

362 The authors declare no competing interests.

363

#### 364 **DATA AND REAGENT AVAILABILITY**

365 All data and reagents are available upon request.

366

#### 367 **REFERENCES**

368 Ader, Christian, Steffen Frey, Werner Maas, Hermann Broder Schmidt, Dirk Görlich, and Marc Baldus.  
369 2010. "Amyloid-like Interactions within Nucleoporin FG Hydrogels." *Proceedings of the National*  
370 *Academy of Sciences of the United States of America* 107 (14): 6281–85.

371 <https://doi.org/10.1073/pnas.0910163107>.

372 Bayliss, Richard, Trevor Littlewood, and Murray Stewart. 2000. "Structural Basis for the Interaction  
373 between FxFG Nucleoporin Repeats and Importin- $\beta$  in Nuclear Trafficking." *Cell* 102 (1): 99–  
374 108. [https://doi.org/10.1016/S0092-8674\(00\)00014-3](https://doi.org/10.1016/S0092-8674(00)00014-3).

375 Bösl, Benjamin, Valerie Grimminger, and Stefan Walter. 2006. "The Molecular Chaperone Hsp104-A  
376 Molecular Machine for Protein Disaggregation." *Journal of Structural Biology* 156 (1): 139–48.  
377 <https://doi.org/10.1016/j.jsb.2006.02.004>.

378 Celetti, Giorgia, Giulia Paci, Joana Caria, Virginia VanDelinder, George Bachand, and Edward A.  
379 Lemke. 2020. "The Liquid State of FG-Nucleoporins Mimics Permeability Barrier Properties of  
380 Nuclear Pore Complexes." *Journal of Cell Biology* 219 (1).

381 <https://doi.org/10.1083/jcb.201907157>.

382 Chowdhury, Rajdeep, Abhishek Sau, and Siegfried M. Musser. 2022. "Super-Resolved 3D Tracking of

- 383 Cargo Transport through Nuclear Pore Complexes." *Nature Cell Biology* 24 (1): 112–22.  
384 <https://doi.org/10.1038/s41556-021-00815-6>.
- 385 Davis, Luke K., Ian J. Ford, and Bart W. Hoogenboom. 2022. "Crowding-Induced Phase Separation of  
386 Nuclear Transport Receptors in FG Nucleoporin Assemblies." *ELife* 11: 1–20.  
387 <https://doi.org/10.7554/eLife.72627>.
- 388 Dultz, Elisa, Matthias Wojtynek, Ohad Medalia, and Evgeny Onischenko. 2022. "The Nuclear Pore  
389 Complex: Birth, Life, and Death of a Cellular Behemoth." *Cells* 11 (9): 1–28.  
390 <https://doi.org/10.3390/cells11091456>.
- 391 Fernandez-Martinez, Javier, and Michael P. Rout. 2021. "One Ring to Rule Them All? Structural and  
392 Functional Diversity in the Nuclear Pore Complex." *Trends in Biochemical Sciences* 46 (7): 595–  
393 607. <https://doi.org/10.1016/j.tibs.2021.01.003>.
- 394 Fisher, Patrick D. Ellis, Qi Shen, Bernice Akpınar, Luke K. Davis, Kenny Kwok Hin Chung, David  
395 Baddeley, Andela Šarić, et al. 2018. "A Programmable DNA Origami Platform for Organizing  
396 Intrinsically Disordered Nucleoporins within Nanopore Confinement." *ACS Nano* 12 (2): 1508–  
397 18. <https://doi.org/10.1021/acsnano.7b08044>.
- 398 Fragasso, Alessio, Hendrik W de Vries, John Andersson, Eli O van der Sluis, Erik van der Giessen,  
399 Patrick R Onck, and Cees Dekker. 2022. "Transport Receptor Occupancy in Nuclear Pore  
400 Complex Mimics." *Nano Research* 15 (11): 9689–9703.
- 401 Frey, Steffen, Ralf P. Richter, and Dirk Görlich. 2006. "FG-Rich Repeats of Nuclear Pore Proteins Form  
402 a Three-Dimensional Meshwork with Hydrogel-like Properties." *Science* 314 (5800): 815–17.  
403 <https://doi.org/10.1126/science.1132516>.
- 404 Ghavami, Ali, Liesbeth M. Veenhoff, Erik Van Der Giessen, and Patrick R. Onck. 2014. "Probing the  
405 Disordered Domain of the Nuclear Pore Complex through Coarse-Grained Molecular Dynamics  
406 Simulations." *Biophysical Journal* 107 (6): 1393–1402.  
407 <https://doi.org/10.1016/j.bpj.2014.07.060>.
- 408 Glover, John R., and Susan Lindquist. 1998. "Hsp104, Hsp70, and Hsp40: A Novel Chaperone System  
409 That Rescues Previously Aggregated Proteins." *Cell* 94 (1): 73–82.  
410 [https://doi.org/10.1016/S0092-8674\(00\)81223-4](https://doi.org/10.1016/S0092-8674(00)81223-4).
- 411 Hampoelz, Bernhard, Amparo Andres-Pons, Panagiotis Kastiris, and Martin Beck. 2019. "Structure  
412 and Assembly of the Nuclear Pore Complex." *Annual Review of Biophysics* 48: 515–36.  
413 <https://doi.org/10.1146/annurev-biophys-052118-115308>.

- 414 Harari, Anna, Guy Zoltsman, Tal Levin, and Rina Rosenzweig. 2022. "Hsp104 N-Terminal Domain  
415 Interaction with Substrates Plays a Regulatory Role in Protein Disaggregation." *FEBS Journal*  
416 289 (17): 5359–77. <https://doi.org/10.1111/febs.16441>.
- 417 Hayama, Ryo, Samuel Sparks, Lee M. Hecht, Kaushik Dutta, Jerome M. Karp, Christina M. Cabana,  
418 Michael P. Rout, David Cowburn, and Norma M. Allewell. 2018. "Thermodynamic  
419 Characterization of the Multivalent Interactions Underlying Rapid and Selective Translocation  
420 through the Nuclear Pore Complex." *Journal of Biological Chemistry* 293 (12): 4555–63.  
421 <https://doi.org/10.1074/jbc.AC117.001649>.
- 422 Hoogenboom, Bart W., Loren E. Hough, Edward A. Lemke, Roderick Y.H. Lim, Patrick R. Onck, and  
423 Anton Zilman. 2021. "Physics of the Nuclear Pore Complex: Theory, Modeling and Experiment."  
424 *Physics Reports* 921: 1–53. <https://doi.org/10.1016/j.physrep.2021.03.003>.
- 425 Hough, Loren E., Kaushik Dutta, Samuel Sparks, Deniz B. Temel, Alia Kamal, Jaclyn Tetenbaum-  
426 Novatt, Michael P. Rout, and David Cowburn. 2015. "The Molecular Mechanism of Nuclear  
427 Transport Revealed by Atomic-Scale Measurements." *ELife* 4 (September): 1–23.  
428 <https://doi.org/10.7554/eLife.10027>.
- 429 Huang, Kai, and Igal Szleifer. 2020. "Modeling the Nucleoporins That Form the Hairy Pores."  
430 *Biochemical Society Transactions* 48 (4): 1447–61. <https://doi.org/10.1042/BST20190941>.
- 431 Huh, W K., Falvo, J V., Gerke, L C., Carroll, et al. 2003. "Global Analysis of Protein Localization in  
432 Budding Yeast." *Nature* 425 (6959): 686–91. <http://yeastgfp.ucsf.edu>.
- 433 Imamura, Hiromi, Kim P. Huynh Nhat, Hiroko Togawa, Kenta Saito, Ryota Iino, Yasuyuki Kato-  
434 Yamada, Takeharu Nagai, and Hiroyuki Noji. 2009. "Visualization of ATP Levels inside Single  
435 Living Cells with Fluorescence Resonance Energy Transfer-Based Genetically Encoded  
436 Indicators." *Proceedings of the National Academy of Sciences* 106 (37): 15651–56.  
437 <https://doi.org/10.1073/pnas.0904764106>.
- 438 Isgro, Timothy A., and Klaus Schulten. 2007. "Association of Nuclear Pore FG-Repeat Domains to  
439 NTF2 Import and Export Complexes." *Journal of Molecular Biology* 366 (1): 330–45.  
440 <https://doi.org/10.1016/j.jmb.2006.11.048>.
- 441 Jäggi, Rainer D., Alfredo Franco-Obregón, Petra Mühlhäusser, Franziska Thomas, Ulrike Kutay, and  
442 Klaus Ensslin. 2003. "Modulation of Nuclear Pore Topology by Transport Modifiers." *Biophysical*  
443 *Journal* 84 (1): 665–70. [https://doi.org/10.1016/S0006-3495\(03\)74886-3](https://doi.org/10.1016/S0006-3495(03)74886-3).
- 444 Janke, Carsten, Maria M. Magiera, Nicole Rathfelder, Christof Taxis, Simone Reber, Hiromi Maekawa,

- 445 Alexandra Moreno-Borchart, et al. 2004. "A Versatile Toolbox for PCR-Based Tagging of Yeast  
446 Genes: New Fluorescent Proteins, More Markers and Promoter Substitution Cassettes." *Yeast*  
447 21 (11): 947–62. <https://doi.org/10.1002/yea.1142>.
- 448 Jovanovic-Talisman, Tijana, Jaclyn Tetenbaum-Novatt, Anna Sophia McKenney, Anton Zilman, Reiner  
449 Peters, Michael P. Rout, and Brian T. Chait. 2009. "Artificial Nanopores That Mimic the  
450 Transport Selectivity of the Nuclear Pore Complex." *Nature* 457 (7232): 1023–27.  
451 <https://doi.org/10.1038/nature07600>.
- 452 Kalita, Joanna, Larisa E. Kapinos, and Roderick Y.H. Lim. 2021. "On the Asymmetric Partitioning of  
453 Nucleocytoplasmic Transport – Recent Insights and Open Questions." *Journal of Cell Science*  
454 134 (7). <https://doi.org/10.1242/jcs.240382>.
- 455 Kalita, Joanna, Larisa E. Kapinos, Tiantian Zheng, Chantal Rencurel, Anton Zilman, and Roderick Y.H.  
456 Lim. 2022. "Karyopherin Enrichment and Compensation Fortifies the Nuclear Pore Complex  
457 against Nucleocytoplasmic Leakage." *Journal of Cell Biology* 221 (3).  
458 <https://doi.org/10.1083/jcb.202108107>.
- 459 Kapinos, Larisa E., Binlu Huang, Chantal Rencurel, and Roderick Y.H. Lim. 2017. "Karyopherins  
460 Regulate Nuclear Pore Complex Barrier and Transport Function." *Journal of Cell Biology* 216  
461 (11): 3609–24. <https://doi.org/10.1083/jcb.201702092>.
- 462 Kapinos, Larisa E., Rafael L. Schoch, Raphael S. Wagner, Kai D. Schleicher, and Roderick Y.H. Lim.  
463 2014. "Karyopherin-Centric Control of Nuclear Pores Based on Molecular Occupancy and  
464 Kinetic Analysis of Multivalent Binding with FG Nucleoporins." *Biophysical Journal* 106 (8):  
465 1751–62. <https://doi.org/10.1016/j.bpj.2014.02.021>.
- 466 Kim, Seung Joong, Javier Fernandez-Martinez, Ilona Nudelman, Yi Shi, Wenzhu Zhang, Barak Raveh,  
467 Thurston Herricks, et al. 2018. "Integrative Structure and Functional Anatomy of a Nuclear Pore  
468 Complex." *Nature* 555 (7697): 475–82. <https://doi.org/10.1038/nature26003>.
- 469 Kowalczyk, Stefan W., Larisa Kapinos, Timothy R. Blosser, Tomás Magalhães, Pauline Van Nies,  
470 Roderick Y.H. Lim, and Cees Dekker. 2011. "Single-Molecule Transport across an Individual  
471 Biomimetic Nuclear Pore Complex." *Nature Nanotechnology* 6 (7): 433–38.  
472 <https://doi.org/10.1038/nnano.2011.88>.
- 473 Kroschwald, Sonja, Shovamayee Maharana, and Alberti Simon. 2017. "Hexanediol: A Chemical Probe  
474 to Investigate the Material Properties of Membrane-Less Compartments." *Matters*, 1–7.  
475 <https://doi.org/10.19185/matters.201702000010>.

- 476 Kuiper, E. F.Elsiena, Paola Gallardo, Tessa Bergsma, Muriel Mari, Maiara Kolbe Musskopf, Jeroen  
477 Kuipers, Ben N.G. Giepmans, et al. 2022. "The Chaperone DNAJB6 Surveils FG-Nucleoporins and  
478 Is Required for Interphase Nuclear Pore Complex Biogenesis." *Nature Cell Biology* 24 (11):  
479 1584–94. <https://doi.org/10.1038/s41556-022-01010-x>.
- 480 Lin, Yi, Eiichiro Mori, Masato Kato, Siheng Xiang, Leeju Wu, Ilmin Kwon, and Steven L. McKnight.  
481 2016. "Toxic PR Poly-Dipeptides Encoded by the C9orf72 Repeat Expansion Target LC Domain  
482 Polymers." *Cell* 167 (3): 789-802.e12. <https://doi.org/10.1016/j.cell.2016.10.003>.
- 483 Lindt, Joris Van, Tamas Lazar, Donya Pakravan, Manon Demulder, Attila Meszaros, Ludo Van Den  
484 Bosch, Dominique Maes, and Peter Tompa. 2022. "F/YGG-Motif Is an Intrinsically Disordered  
485 Nucleic-Acid Binding Motif." *RNA Biology* 19 (1): 622–35.  
486 <https://doi.org/10.1080/15476286.2022.2066336>.
- 487 Lowe, Alan R., Jeffrey H. Tang, Jaime Yassif, Michael Graf, William Y.C. Huang, Jay T. Groves, Karsten  
488 Weis, and Jan T. Liphardt. 2015. "Importin- $\beta$  Modulates the Permeability of the Nuclear Pore  
489 Complex in a Ran-Dependent Manner." *ELife* 2015 (4): 1–24.  
490 <https://doi.org/10.7554/eLife.04052>.
- 491 Mattheyses, Alexa L., Martin Kampmann, Claire E. Atkinson, and Sanford M. Simon. 2010.  
492 "Fluorescence Anisotropy Reveals Order and Disorder of Protein Domains in the Nuclear Pore  
493 Complex." *Biophysical Journal* 99 (6): 1706–17. <https://doi.org/10.1016/j.bpj.2010.06.075>.
- 494 Meinema, Anne C., Bert Poolman, and Liesbeth M. Veenhoff. 2013. "Quantitative Analysis of  
495 Membrane Protein Transport Across the Nuclear Pore Complex." *Traffic* 14 (5): 487–501.  
496 <https://doi.org/10.1111/tra.12048>.
- 497 Miesenböck, Gero, Dino A De Angelis, and James E Rothman. 1998. "Visualizing Secretion and  
498 Synaptic Transmission with PH-Sensitive Green Fluorescent Proteins." *Nature* 394 (July): 192–  
499 95. <https://www.nature.com/articles/BF28190>.
- 500 Milles, Sigrid, Davide Mercadante, Iker Valle Aramburu, Malene Ringkjøbing Jensen, Niccolò  
501 Banterle, Christine Koehler, Swati Tyagi, et al. 2015. "Plasticity of an Ultrafast Interaction  
502 between Nucleoporins and Nuclear Transport Receptors." *Cell* 163 (3): 734–45.  
503 <https://doi.org/10.1016/j.cell.2015.09.047>.
- 504 Molliex, Amandine, Jamshid Temirov, Jihun Lee, Maura Coughlin, Anderson P. Kanagaraj, Hong Joo  
505 Kim, Tanja Mittag, and J. Paul Taylor. 2015. "Phase Separation by Low Complexity Domains  
506 Promotes Stress Granule Assembly and Drives Pathological Fibrillization." *Cell* 163 (1): 123–33.



- 507 <https://doi.org/10.1016/j.cell.2015.09.015>.
- 508 Mouton, Sara N., David J. Thaller, Matthew M. Crane, Irina L. Rempel, Owen Terpstra, Anton Steen,  
509 Matt Kaeberlein, C. Patrick Lusk, Arnold J. Boersma, and Liesbeth M. Veenhoff. 2020. "A  
510 Physicochemical Perspective of Aging from Single-Cell Analysis of Ph, Macromolecular and  
511 Organellar Crowding in Yeast." *ELife* 9: 1–42. <https://doi.org/10.7554/ELIFE.54707>.
- 512 Onischenko, Evgeny, Jeffrey H. Tang, Kasper R. Andersen, Kevin E. Knockenhauer, Pascal Vallotton,  
513 Carina P. Derrer, Annemarie Kralt, et al. 2017. "Natively Unfolded FG Repeats Stabilize the  
514 Structure of the Nuclear Pore Complex." *Cell* 171 (4): 904–917.e19.  
515 <https://doi.org/10.1016/j.cell.2017.09.033>.
- 516 Paci, Giulia, Joana Caria, and Edward A. Lemke. 2021. "Cargo Transport through the Nuclear Pore  
517 Complex at a Glance." *Journal of Cell Science* 134 (2). <https://doi.org/10.1242/jcs.247874>.
- 518 Patel, Samir S., Brian J. Belmont, Joshua M. Sante, and Michael F. Rexach. 2007. "Natively Unfolded  
519 Nucleoporins Gate Protein Diffusion across the Nuclear Pore Complex." *Cell* 129 (1): 83–96.  
520 <https://doi.org/10.1016/j.cell.2007.01.044>.
- 521 Popken, Petra, Ali Ghavami, Patrick R. Onck, Bert Poolman, and Liesbeth M. Veenhoff. 2015. "Size-  
522 Dependent Leak of Soluble and Membrane Proteins through the Yeast Nuclear Pore Complex."  
523 *Molecular Biology of the Cell* 26 (7): 1386–94. <https://doi.org/10.1091/mbc.E14-07-1175>.
- 524 Rempel, Irina L., Matthew M. Crane, David J Thaller, Ankur Mishra, Daniel P.M. Jansen, Georges  
525 Janssens, Petra Popken, et al. 2019. "Age-Dependent Deterioration of Nuclear Pore Assembly in  
526 Mitotic Cells Decreases Transport Dynamics." *ELife* 8 (June): 1–26.  
527 <https://doi.org/10.7554/eLife.48186>.
- 528 Ribbeck, Katharina, and Dirk Görlich. 2002. "The Permeability Barrier of Nuclear Pore Complexes  
529 Appears to Operate via Hydrophobic Exclusion." *EMBO Journal* 21 (11): 2664–71.  
530 <https://doi.org/10.1093/emboj/21.11.2664>.
- 531 Sakiyama, Yusuke, Adam Mazur, Larisa E. Kapinos, and Roderick Y.H. Lim. 2016. "Spatiotemporal  
532 Dynamics of the Nuclear Pore Complex Transport Barrier Resolved by High-Speed Atomic Force  
533 Microscopy." *Nature Nanotechnology* 11 (8): 719–23. <https://doi.org/10.1038/nnano.2016.62>.
- 534 Sanchez, Yolanda, and Susan L. Lindquist. 1990. "HSP104 Required for Induced Thermotolerance."  
535 *Science* 248 (4959): 1112–15. <https://doi.org/10.1126/science.2188365>.
- 536 Schindelin, Johannes, Ignacio Arganda-Carreras, Erwin Frise, Verena Kaynig, Mark Longair, Tobias  
537 Pietzsch, Stephan Preibisch, et al. 2012. "Fiji: An Open-Source Platform for Biological-Image

- 538 Analysis." *Nature Methods* 9 (7): 676–82. <https://doi.org/10.1038/nmeth.2019>.
- 539 Schmidt, Hermann B. roder, and Dirk Görlich. 2015. "Nup98 FG Domains from Diverse Species  
540 Spontaneously Phase-Separate into Particles with Nuclear Pore-like Permselectivity." *ELife* 4: 1–  
541 30. <https://doi.org/10.7554/eLife.04251>.
- 542 Schnell, Steven J, Mark Tingey, and Weidong Yang. 2022. "Speed Microscopy: High-Speed Single  
543 Molecule Tracking and Mapping of Nucleocytoplasmic Transport." *Methods Mol Biol* 2502:  
544 353–71. [https://doi.org/https://doi.org/10.1007/978-1-0716-2337-4\\_23](https://doi.org/https://doi.org/10.1007/978-1-0716-2337-4_23).
- 545 Semmelink, Marije F W, Hamidreza Jafarinaia, Justina C Wolters, Teodora Gheorghe, Sara N Mouton,  
546 Patrick R Onck, Liesbeth M Veenhoff, Nuclear Pore Complex, and Nuclear Transport Receptor.  
547 2022. "Nuclear Transport under Stress Phenocopies Transport Defects in Models of C9Orf72  
548 ALS," 1–38. bioRxiv 2022.04.13.488135; doi: <https://doi.org/10.1101/2022.04.13.488135>
- 549 Shi, Kevin Y., Eiichiro Mori, Zehra F. Nizami, Yi Lin, Masato Kato, Siheng Xiang, Leeju C. Wu, et al.  
550 2017. "Toxic PRn Poly-Dipeptides Encoded by the C9orf72 Repeat Expansion Block Nuclear  
551 Import and Export." *Proceedings of the National Academy of Sciences of the United States of*  
552 *America* 114 (7): E1111–17. <https://doi.org/10.1073/pnas.1620293114>.
- 553 Shulga, Nataliya, and David S. Goldfarb. 2003. "Binding Dynamics of Structural Nucleoporins Govern  
554 Nuclear Pore Complex Permeability and May Mediate Channel Gating." *Molecular and Cellular*  
555 *Biology* 23 (2): 534–42. <https://doi.org/10.1128/mcb.23.2.534-542.2003>.
- 556 Sparks, Samuel, Deniz B. Temel, Michael P. Rout, and David Cowburn. 2018. "Deciphering the 'Fuzzy'  
557 Interaction of FG Nucleoporins and Transport Factors Using Small-Angle Neutron Scattering."  
558 *Structure* 26 (3): 477-484.e4. <https://doi.org/10.1016/j.str.2018.01.010>.
- 559 Springhower, Charis E., Michael K. Rosen, and Yuh Min Chook. 2020. "Karyopherins and  
560 Condensates." *Current Opinion in Cell Biology* 64: 112–23.  
561 <https://doi.org/10.1016/j.ceb.2020.04.003>.
- 562 Thaller, David J., Matteo Allegretti, Sapan Borah, Paolo Ronchi, Martin Beck, and C. Patrick Lusk.  
563 2019. "An Escrt-Lem Protein Surveillance System Is Poised to Directly Monitor the Nuclear  
564 Envelope and Nuclear Transport System." *ELife* 8: 1–36. <https://doi.org/10.7554/eLife.45284>.
- 565 Thaller, David J., Danqing Tong, Christopher J. Marklew, Nicholas R. Ader, Philip J. Mannino, Sapan  
566 Borah, Megan C. King, Barbara Ciani, and C. Patrick Lusk. 2021. "Direct Binding of ESCRT Protein  
567 Chm7 to Phosphatidic Acid-Rich Membranes at Nuclear Envelope Herniations." *Journal of Cell*  
568 *Biology* 220 (3). <https://doi.org/10.1083/JCB.202004222>.

- 569 Timney, Benjamin L., Barak Raveh, Roxana Mironska, Jill M. Trivedi, Seung Joong Kim, Daniel Russel,  
570 Susan R. Wenthe, Andrej Sali, and Michael P. Rout. 2016. "Simple Rules for Passive Diffusion  
571 through the Nuclear Pore Complex." *Journal of Cell Biology* 215 (1): 57–76.  
572 <https://doi.org/10.1083/jcb.201601004>.
- 573 Webster, Brant M, David J Thaller, Jens Jäger, Sarah E Ochmann, Sapan Borah, and C Patrick Lusk.  
574 2016. "Chm7 and Heh1 Collaborate to Link Nuclear Pore Complex Quality Control with Nuclear  
575 Envelope Sealing." *The EMBO Journal* 35 (22): 2447–67.  
576 <https://doi.org/10.15252/emj.201694574>.
- 577 Wheeler, Joshua R., Tyler Matheny, Saumya Jain, Robert Abrisch, and Roy Parker. 2016. "Distinct  
578 Stages in Stress Granule Assembly and Disassembly." *ELife* 5 (Se): 1–25.  
579 <https://doi.org/10.7554/eLife.18413>.
- 580 Wing, Casey E., Ho Yee Joyce Fung, and Yuh Min Chook. 2022. "Karyopherin-Mediated  
581 Nucleocytoplasmic Transport." *Nature Reviews Molecular Cell Biology* 23 (5): 307–28.  
582 <https://doi.org/10.1038/s41580-021-00446-7>.
- 583 Yu, M, M Heidari, S Mikhaleva, P S Tan, S Mingu, H Ruan, C D Reinkermeier, et al. 2022. "Deciphering  
584 the Conformations and Dynamics of FG-Nucleoporins &lt;Em>in Situ&lt;/Em>," *BioRxiv*,  
585 2022.07.07.499201. <http://biorxiv.org/content/early/2022/07/08/2022.07.07.499201.abstract>.
- 586 Zheng, Tiantian, and Anton Zilman. 2023. "Self-Regulation of the Nuclear Pore Complex Enables  
587 Clogging-Free Crowded Transport." *PNAS* 120 (7). [https://doi.org/10.1073/pnas.2212874120/-](https://doi.org/10.1073/pnas.2212874120/-/DCSupplemental)  
588 [/DCSupplemental](https://doi.org/10.1073/pnas.2212874120/-/DCSupplemental). Published.
- 589

590 **FIGURES**

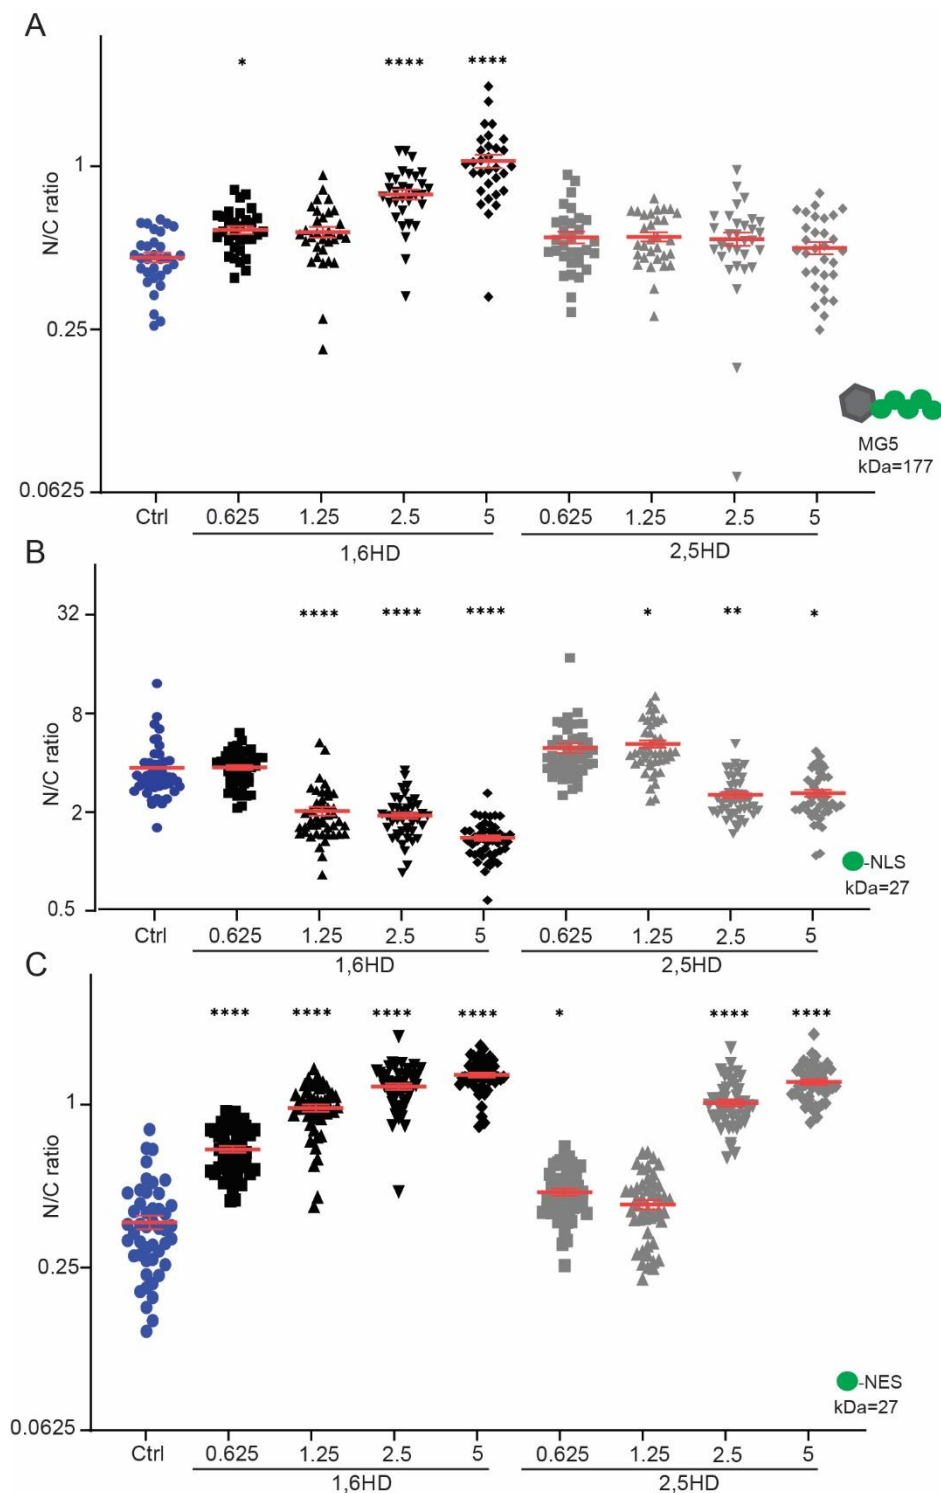

591

592 **Figure 1: Disruption of NPC permeability barrier by 1,6HD.** (A-C) Nuclear compartmentalization of  
593 GFP-based reporter proteins (MG5, GFP-NES, GFP-NLS) in yeast cells exposed for 10 min with the  
594 indicated concentrations of 1,6HD or 2,5HD. MG5 is a fusion of Maltose Binding Protein and 5 GFPs;  
595 GFP-NLS features the classical Simian Virus 40 NLS and GFP-NES the Stress-Seventy subfamily B1 NES.  
596 The N/C ratio is the ratio of the average fluorescence in the nucleus (N) over that in the cytoplasm (C).

597 One-way ANOVA with Dunnett's multiple comparison test comparing treatment to control was used  
598 to calculate the statistical significance of (A) MG5 and (C) GFP-NES, while the non-parametrical  
599 Kruskal-Wallis with Dunn's multiple comparison test comparing treatment to control was used to  
600 calculate the statistical significance of (B) GFP-NLS. Error bars reflect SEM from the mean of three  
601 independent experiments. At least 30 cells per condition were analysed. P-values\* $<0,05$  \*\* $<0,01$   
602 \*\*\*\* $<0,0001$ .

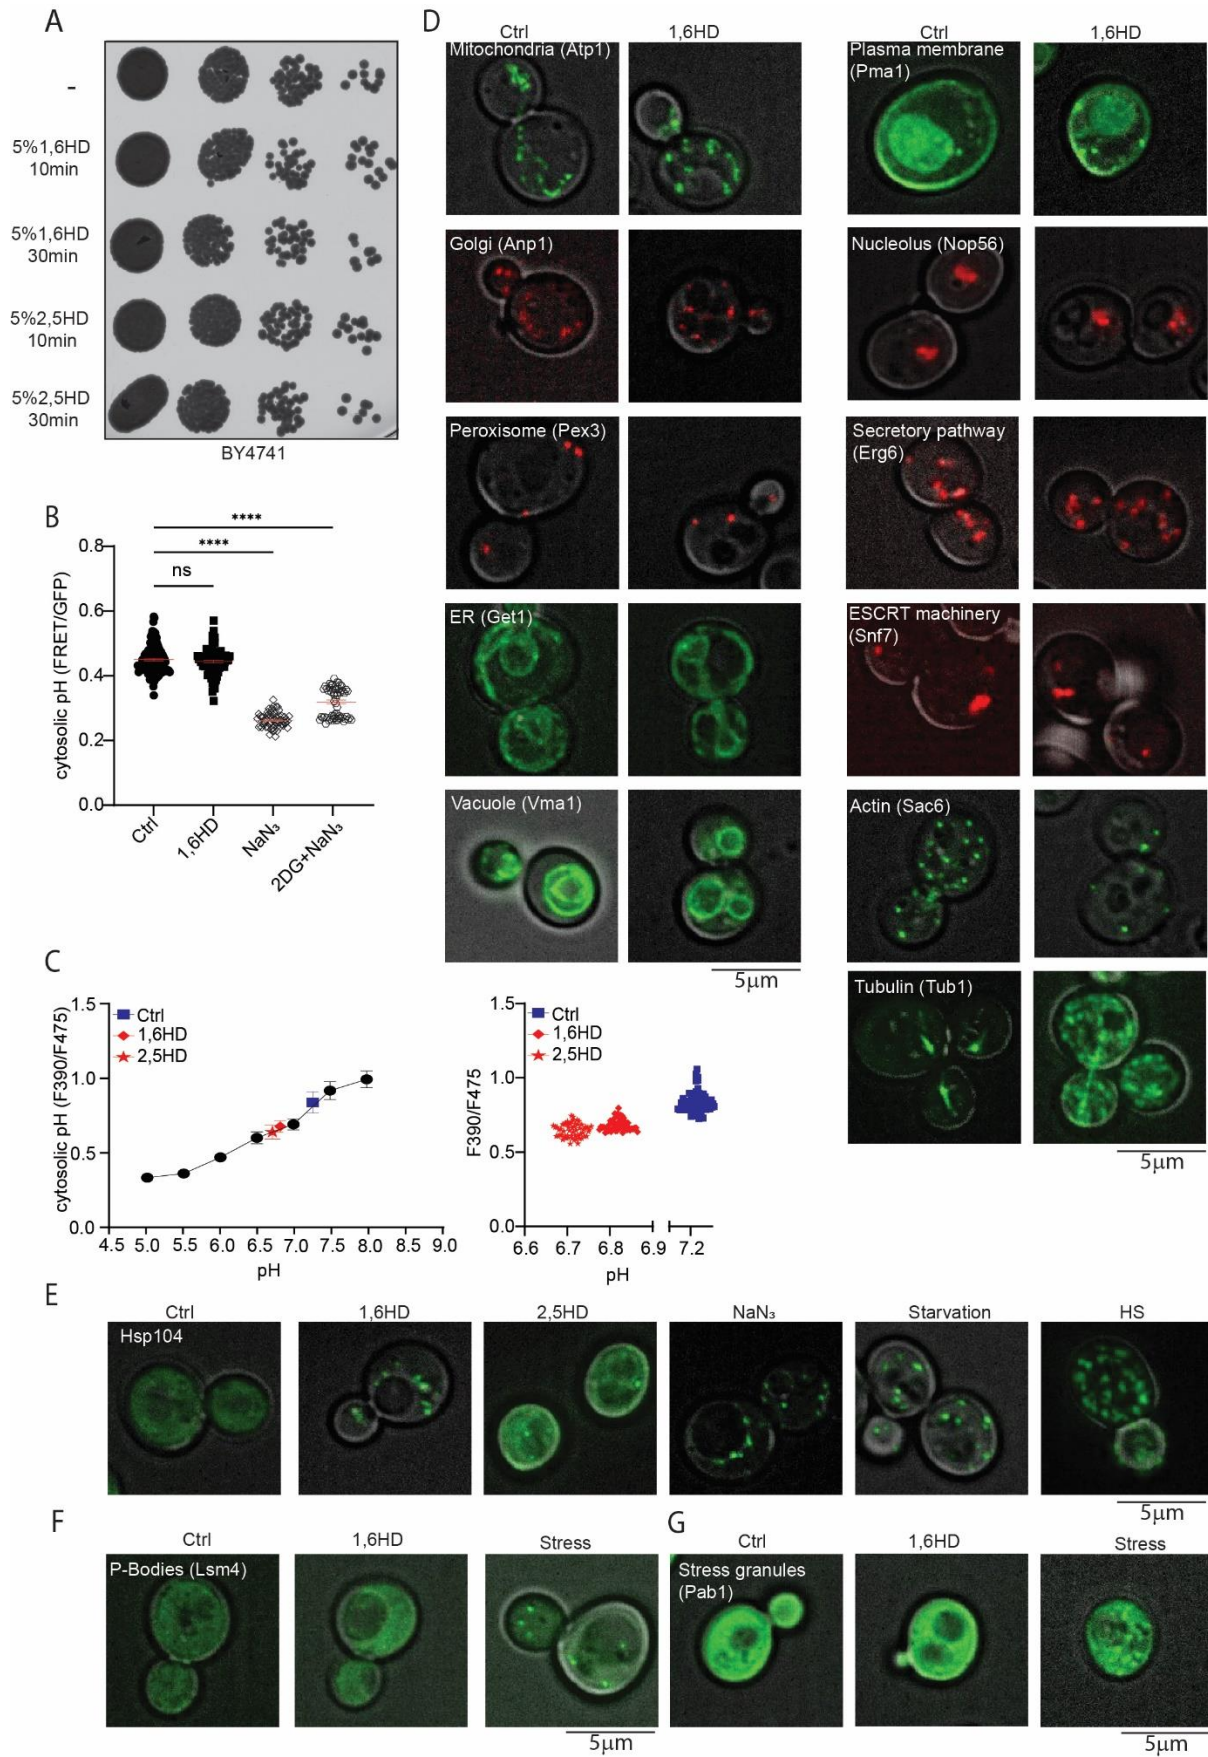

603

604 **Figure 2: Impact of 1,6HD on cell survival, physiology and subcellular structures.** (A) Growth assay  
605 showing serial dilutions of cultures exposed to 5% 1,6HD or 2,5HD for the indicated times. (B) Free  
606 ATP levels in cells measured using a FRET-based ATP-sensor; lower FRET/GFP ratio indicates lower free  
607 ATP. Cells were untreated (ctrl), exposed to 5% 1,6HD for 10 min, or exposed for 30 min to metabolic  
608 poisons azide ( $\text{NaN}_3$ ) or to  $\text{NaN}_3$  plus deoxyglucose ( $\text{NaN}_3 + 2\text{DG}$ ). The error bar of the scatter plot  
609 reflects SEM from the mean of three independent experiments. At least 60 cells per condition were  
610 analysed. Non parametric Mann-Whitney test was used to calculate statistical significance in  
611 FRET/GFP ratios comparing treatment to control. (C) Calibration curve for cytosolic pH values of the  
612 pH sensor pHluorin (F390/F475) in cells (black circles). The pH before (ctrl, blue squares) and after 10  
613 min exposure to 1,6HD (red diamonds) or 2,5 HD (red stars) are indicated. Each point represents data  
614 from 60 cells (left graph), individual measurements are shown (right graph). (D) Fluorescence images  
615 of different cellular structures endogenously tagged with either GFP or mCherry, before and after 10  
616 min exposure to 5% 1,6HD. (E) Fluorescence images showing localization of endogenously tagged  
617 Hsp104-GFP after 10 min exposure to 5% 1,6HD or 5% 2,5HD and under indicated stress conditions.  
618 (F,G) Fluorescence images showing localization of endogenously tagged Lsm4 (P-bodies, F) or Pab1  
619 (Stress granules, G) with GFP after 10 min exposure with 5% 1,6HD and after induction of stress.  
620 Representative images of three independent replicates. The scales bars are  $5\mu\text{m}$ .

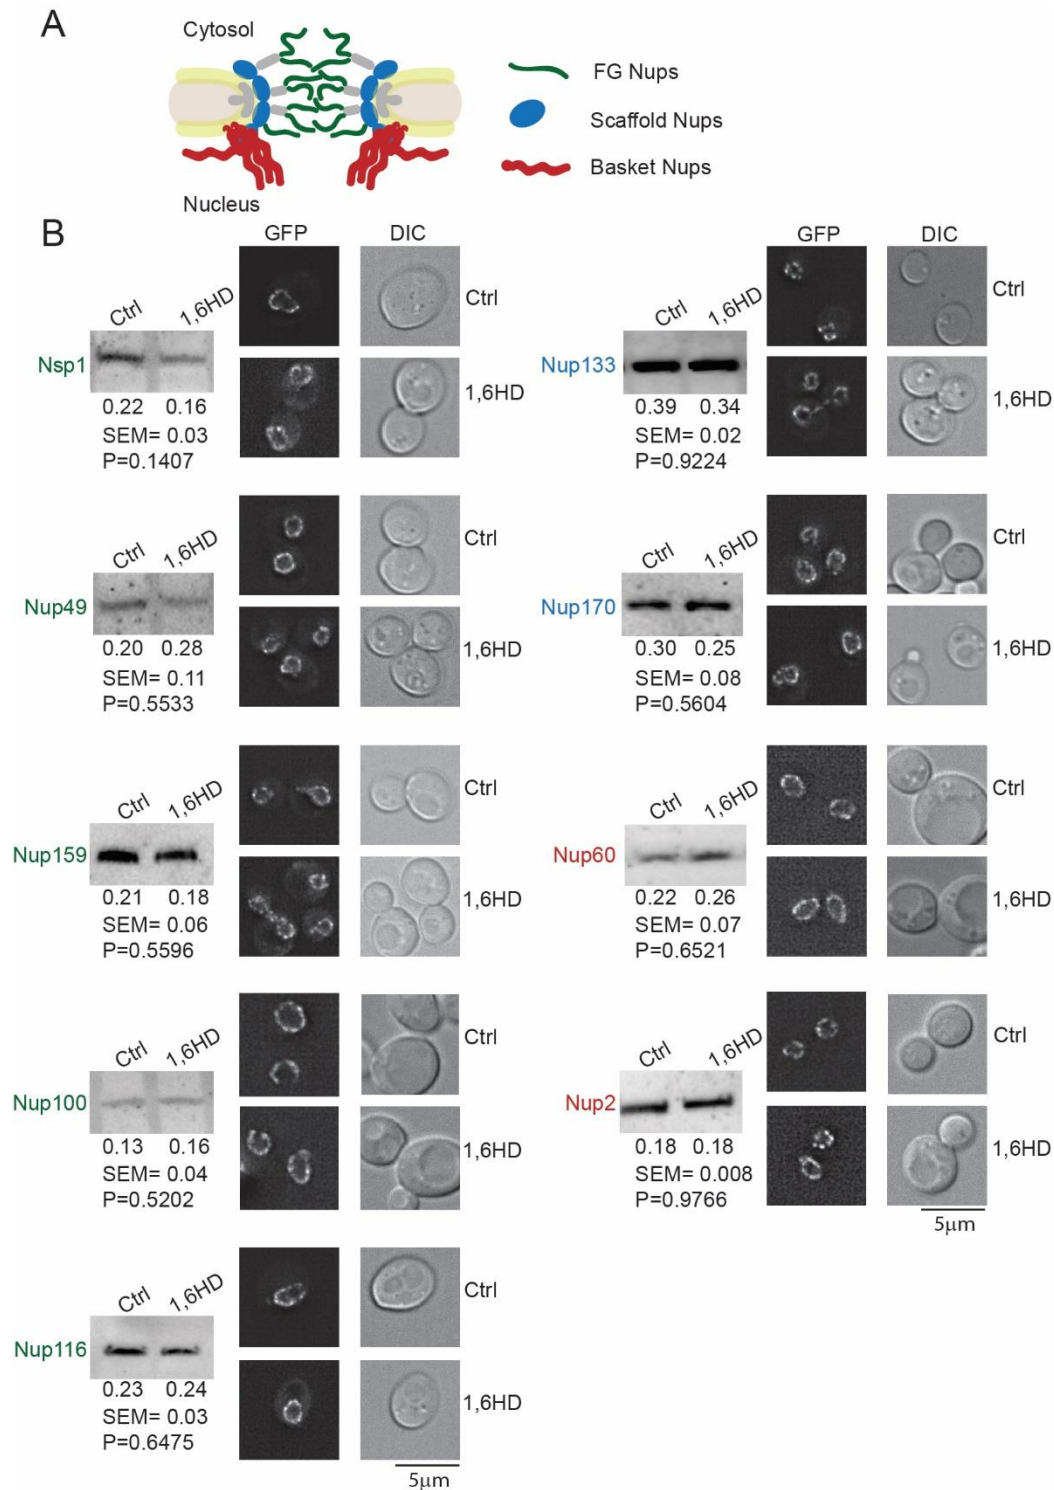

621

622 **Figure 3: Impact of 1,6HD on the abundance and localization of NPC components.** (A) Cartoon  
 623 representation of NPC indicating the position of the nups analyzed in B. (B) Western blot of  
 624 endogenous Nup-GFP protein levels before and after 10 min exposure to 5% 1,6HD; quantification  
 625 gives mean, SEM and P values from at least three independent replicates. Fluorescence images of  
 626 endogenously GFP-tagged nups after 10 min exposure with 5% 1,6HD. Representative images of three  
 627 independent replicates. The scale bar is 5 $\mu$ m.



628

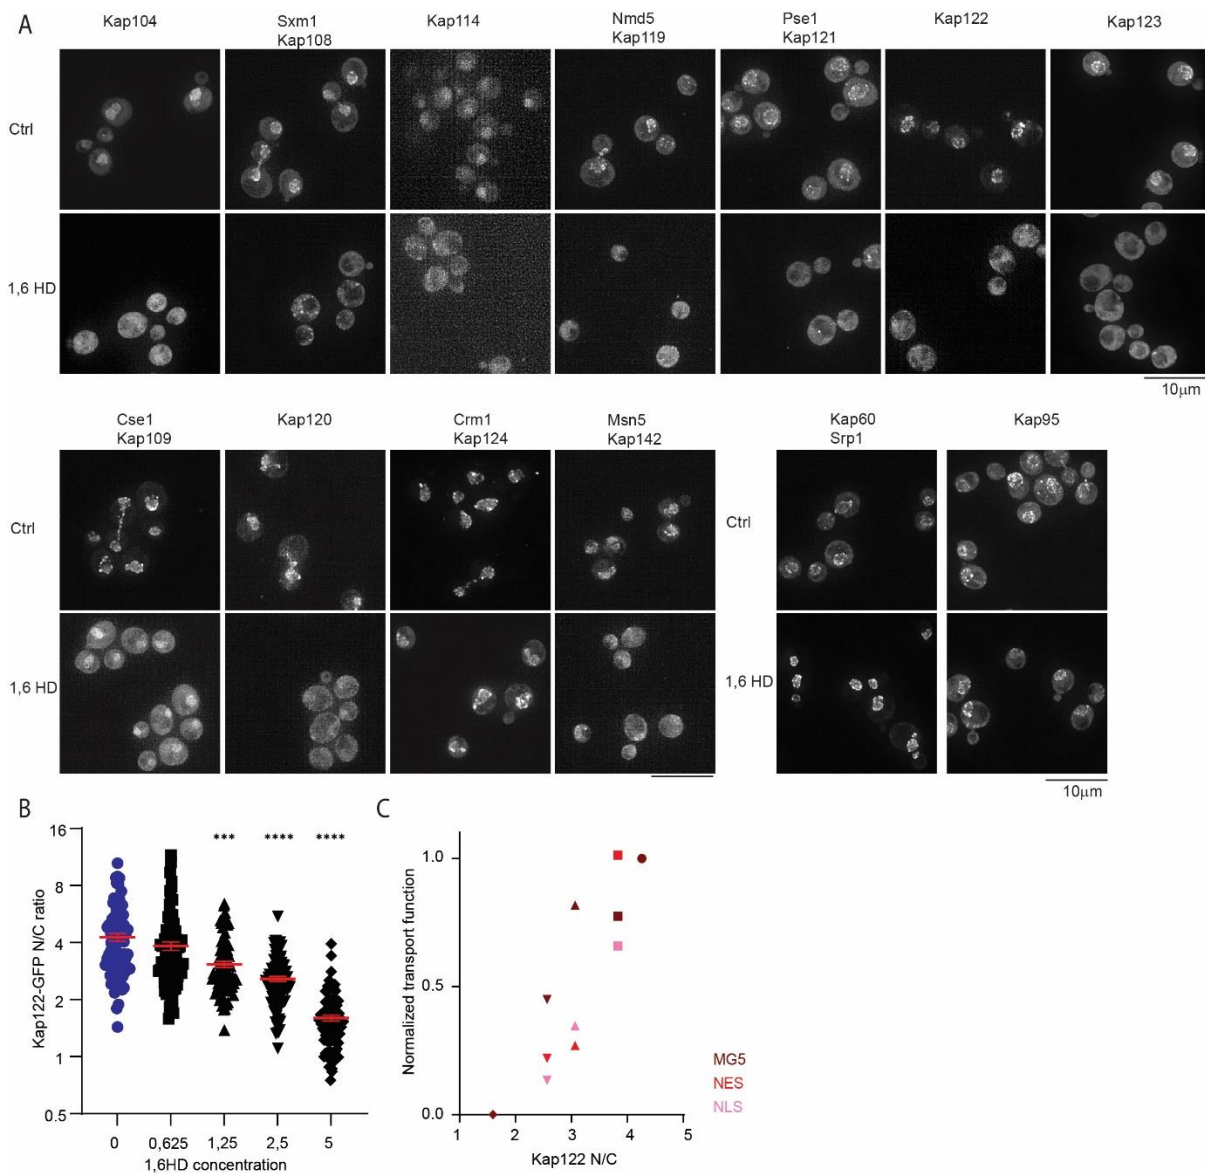

629

630 **Figure 4: Impact of 1,6HD on NTRs.** (A) Fluorescence images of endogenously GFP-tagged NTRs after

631 10 min exposure with 5% 1,6HD. Representative images of three independent replicates. The scale

632 bar is 10 $\mu$ m. (B) Nuclear accumulation of Kap122-GFP in yeast cells exposed for 10 min with the

633 indicated concentrations of 1,6HD. Non-parametrical Kruskal-Wallis with Dunn's multiple comparison

634 test was used to calculate statistical significance, comparing treatment to control. Error bars reflect

635 SEM from the mean of three independent experiments. 90 cells per condition were analyzed. P-values

636 \*\*\*<0,0005 \*\*\*\*<0,0001. (C) Average transport function measured with MG5 (dark red, normalized

637 N/C from Fig1A), GFP-NLS (pink, normalized N/C from Fig1B) and GFP-NES (red, normalized N/C from

638 Fig 1C) as a function of Kap122-GFP location at the NE and nucleus (from Fig 4B) under control

639 conditions and increasing concentrations of 1,6HD (symbols as in 4B: 0% circles; 0,625% squares;

640 1,25% triangles up; 2,5% triangles down; 5% diamonds).

25

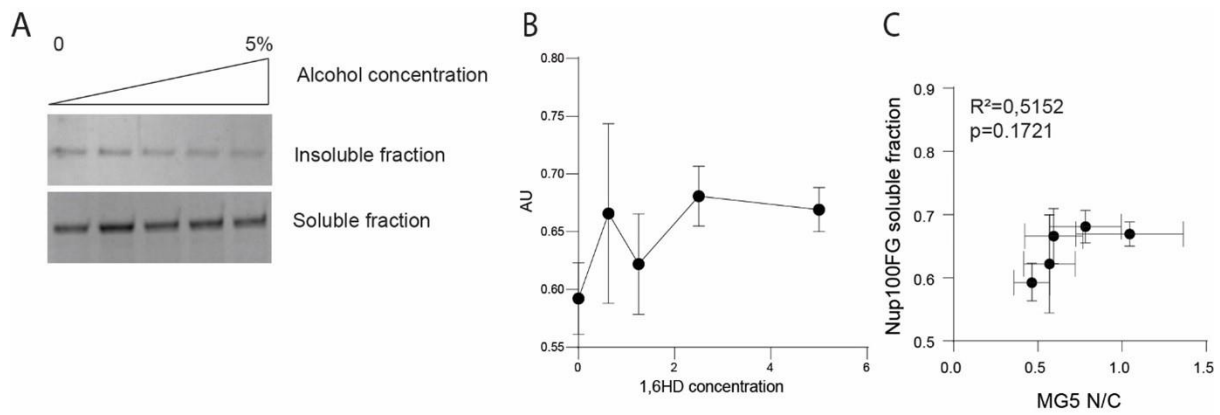

641

642 **Supplementary Figure 1.** (A) Purified Nup100FG domains were left to form condensates for 1 hour  
643 and subsequently treated for 10min with 0, 0.625, 1.25, 2.5 or 5% 1,6HD. Soluble and insoluble  
644 fractions were obtained by centrifugation, separated by SDS-PAGE and visualized by Brilliant Blue  
645 staining. Representative image of three independent experiments. (B) Quantification of the soluble  
646 fractions in (A) Error bars reflect SEM of three independent experiments. (C) Pearson correlation  
647 coefficient and two-tailed P values were calculated for the N/C ratio of reporter MG5 against the  
648 soluble fraction of Nup100FG domain after different concentrations of 1,6HD. Error bars reflect SEM  
649 from the mean of three independent experiments.

A

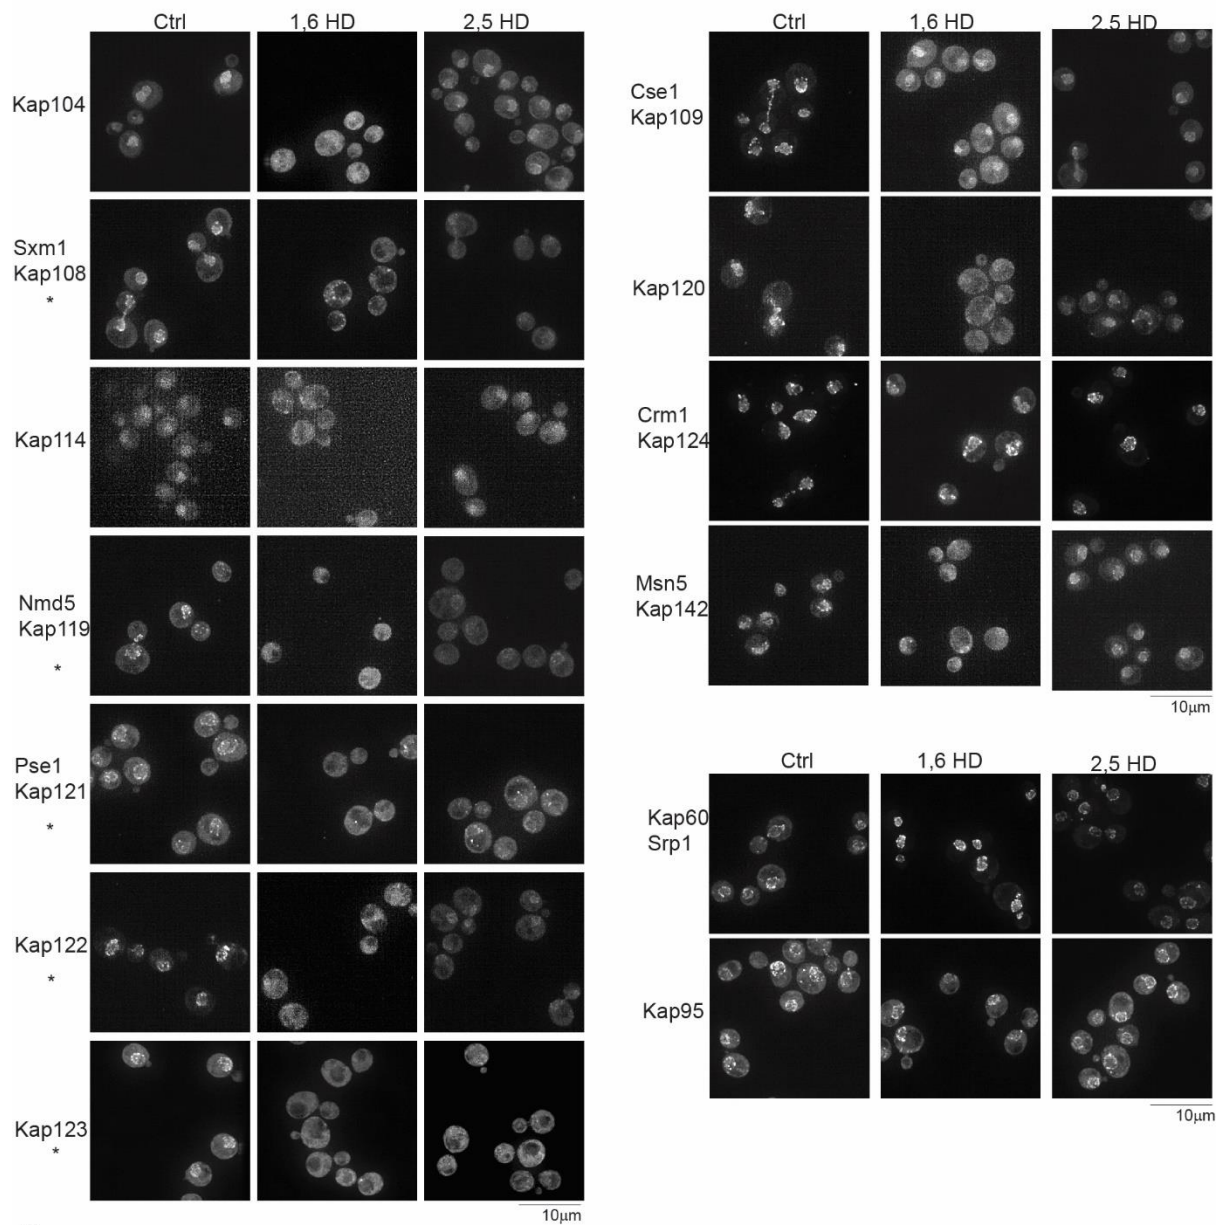

B

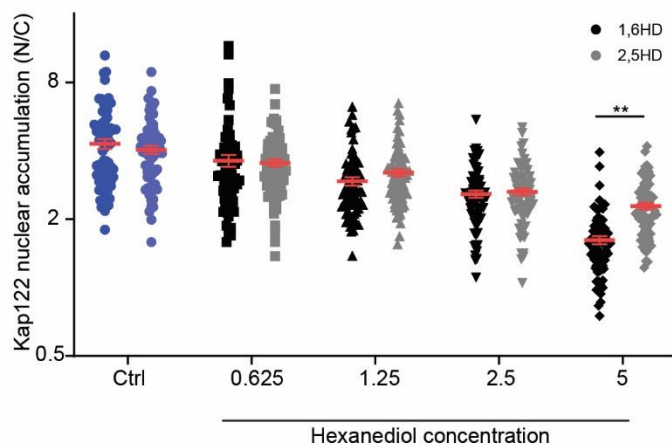

650

27

651 **Supplementary Figure 2** (A) Fluorescence images of endogenously GFP-tagged NTRs after 10 min  
652 exposure with either 5% 1,6HD (middle, as in Fig 4A) or 5% 2,5HD (right). Representative images of  
653 three independent replicates. The scale bar is 10 $\mu$ m. (B) Nuclear accumulation of Kap122-GFP in yeast  
654 cells exposed for 10 min to the indicated concentrations of either 1,6HD (as in Fig 4B) or 2,5HD. Non-  
655 parametrical Kruskal-Wallis with Dunn's multiple comparison test comparing treatment to control was  
656 used to calculate statistical significance. Error bars reflect SEM from the mean of three independent  
657 experiments. 70 cells per condition were analyzed. P-values \*\*<0,005.

658

659 **Table 1: Key resources table**

| <b>Key Resources Table</b>                         |                                                                  |                            |                                                                                          |                               |
|----------------------------------------------------|------------------------------------------------------------------|----------------------------|------------------------------------------------------------------------------------------|-------------------------------|
| <b>Reagent type (species) or resource</b>          | <b>Designation</b>                                               | <b>Source or reference</b> | <b>Identifiers</b>                                                                       | <b>Additional information</b> |
| Gene ( <i>S. cerevisiae</i> )                      | See table 2                                                      |                            |                                                                                          |                               |
| strain, strain background ( <i>S. cerevisiae</i> ) | BY4741                                                           | Invitrogen                 |                                                                                          |                               |
| strain, strain background ( <i>S. cerevisiae</i> ) | BY4742                                                           | Invitrogen                 |                                                                                          |                               |
| strain, strain background ( <i>S. cerevisiae</i> ) | W303                                                             | Invitrogen                 |                                                                                          |                               |
| Genetic reagent ( <i>S. cerevisiae</i> )           | See table 2                                                      |                            |                                                                                          |                               |
| Antibody                                           | Monoclonal antibody mouse anti-GFP                               | Santa Cruz                 | sc-9996                                                                                  | (1:500)                       |
| Antibody                                           | Mouse IgG kappa binding protein conjugated to HRP; m-IgGκ-BP-HRP | Santa Cruz                 | sc-516102                                                                                | (1:10000)                     |
| Recombinant DNA reagent                            | See table 3                                                      |                            |                                                                                          |                               |
| Sequenced-based reagent                            | Nup60_F                                                          | This paper                 | PCR primers<br>GTTGATGAAAATAAAGTTGAGGC<br>TTTCAAGTCCCTATATACCTTTTCG<br>TACGCTGCAGGTCGAC  |                               |
| Sequenced-based reagent                            | Nup60_R                                                          | This paper                 | PCR primers<br>TTGGGCTATACGGTAATTATGTC<br>ACGGCTAAAATTTTCATTATCAAT<br>CGATGAATTCCGAGCTCG |                               |

|                         |                                            |                    |                                                                                        |  |
|-------------------------|--------------------------------------------|--------------------|----------------------------------------------------------------------------------------|--|
| Sequenced-based reagent | Nup133_F                                   | This paper         | PCR primers<br>GAAAAAACTATACCATCAACTA<br>TGAAACCAACTGTAGAATACG<br>GTGACGGTGCTGG        |  |
| Sequenced-based reagent | Nup133_R                                   | This paper         | PCR primers<br>CAGTAAAGTTTATTATATATATGT<br>AAAATTGTATTATAGATATTATCG<br>ATGAATTCGAGCTCG |  |
| Sequenced-based reagent | Pab1_F                                     | This paper         | PCR primers<br>GTCTTTCAAAAAGGAGCAAGAAC<br>AACAACTGAGCAAGCTCGTACG<br>CTGCAGGTCGAC       |  |
| Sequenced-based reagent | Pab1_R                                     | This paper         | PCR primers<br>GTTTGTTGAGTAGGGAAGTAGGT<br>GATTACATAGAGCATTAAATCGAT<br>GAATTCGAGCTCG    |  |
| chemical compound, drug | Yeast extract                              | BD                 | 291946                                                                                 |  |
| chemical compound, drug | Complete supplement mixture complete       | Formedium          | DCS0019                                                                                |  |
| chemical compound, drug | D-Glucose anhydrous                        | Fisher Chemical™   | 10141520                                                                               |  |
| chemical compound, drug | D-Raffinose pentahydrate                   | Thermo Scientific  | 195675000                                                                              |  |
| chemical compound, drug | D-Galactose                                | Acros Organics     | 150610010                                                                              |  |
| chemical compound, drug | Phosphatase buffered saline                | Sigma-Aldrich      | P4417                                                                                  |  |
| chemical compound, drug | Tris base                                  | Fisher Scientific™ | BP152-1                                                                                |  |
| chemical compound, drug | HEPES                                      | Fisher Scientific™ | BP310-500                                                                              |  |
| chemical compound, drug | Sodium dodecyl sulfate (SDS) solution, 20% | SERVA              | 20767.03                                                                               |  |

|                         |                                        |                    |             |  |
|-------------------------|----------------------------------------|--------------------|-------------|--|
| chemical compound, drug | EDTA                                   | Sigma-Aldrich      | ED2P-500    |  |
| chemical compound, drug | Triton X-100                           | Acros Organics     | 215682500   |  |
| chemical compound, drug | 2-mercaptoethanol                      | Sigma-Aldrich      | M6250-100   |  |
| chemical compound, drug | Sodium chloride                        | Acros Organics     | 207790010   |  |
| chemical compound, drug | Tween20                                | MP Biomedicals     | TWEEN201    |  |
| chemical compound, drug | Magnesium chloride hexahydrate         | Sigma-Aldrich      | M2393       |  |
| chemical compound, drug | Sodium acetate anhydrous               | Fisher Chemical™   | S2080/53    |  |
| chemical compound, drug | Magnesium acetate tetrahydrate         | Fisher Scientific™ | BP215       |  |
| chemical compound, drug | Glycerol                               | Sigma-Aldrich      | G5516       |  |
| chemical compound, drug | Phenylmethanesulfonyl fluoride (PMSF)  | Sigma-Aldrich      | P7626       |  |
| chemical compound, drug | cOmplete ULTRA tablets, Mini EDTA-free | Roche              | 05892791001 |  |
| chemical compound, drug | Albumine bovine serum (BSA)            | Acros Organics     | 268131000   |  |
| chemical compound, drug | Glass beads                            | BioSpec Products   | 11079105    |  |
| chemical compound, drug | Pierce™ BCA Protein Assay Kit          | Fisher Scientific™ | 23225       |  |

|                         |                                              |                          |             |  |
|-------------------------|----------------------------------------------|--------------------------|-------------|--|
| chemical compound, drug | ECL Prime Western Blotting Detection Reagent | Amersham                 | RPN2232     |  |
| chemical compound, drug | GX Stain-Free™ FastCast™ Acrylamide Kit, 10% | BioRad                   | 1610183     |  |
| chemical compound, drug | PVDF Transfer Membrane                       | Thermo Scientific        | 88518       |  |
| chemical compound, drug | Methanol Technical                           | VWR                      | 20903.368   |  |
| chemical compound, drug | IPTG                                         | Sigma-Aldrich            | 10724815001 |  |
| chemical compound, drug | Ni sepharose                                 | Cytiva                   | 17531802    |  |
| chemical compound, drug | Guanidine hydrochloride                      | Thermo Scientific        | 24110       |  |
| chemical compound, drug | Brilliant blue G                             | Sigma-Aldrich            | G-250       |  |
| chemical compound, drug | 1,6 hexandiol                                | Sigma-Aldrich            | 240117-50   |  |
| chemical compound, drug | 2,5 hexandiol                                | Sigma-Aldrich            | H11904-50   |  |
| chemical compound, drug | Sodium azide                                 | Sigma-Aldrich            | S2002-100   |  |
| chemical compound, drug | 2-deoxy-d-glucose                            | Sigma-Aldrich            | D8375-1     |  |
| software, algorithm     | Fiji                                         | (Schindelin et al. 2012) |             |  |
| software, algorithm     | Resolve3D SoftWoRx                           | Cytiva                   |             |  |

660



661 Table 2 Yeast strains used in this publication

| Strain BY4741 <sup>1</sup>                                                                                                                                                                                                                                                                                           | Genotype                                                                                                         | Source                     |
|----------------------------------------------------------------------------------------------------------------------------------------------------------------------------------------------------------------------------------------------------------------------------------------------------------------------|------------------------------------------------------------------------------------------------------------------|----------------------------|
| yPP008; GFP-tcNLS                                                                                                                                                                                                                                                                                                    | Mata his3Δ1 leu2Δ0 met15Δ0<br>ura3Δ0 GFP-tcNLS(pGal1)::His<br>Nup49-mCh::URA                                     | (Rempel et al.<br>2019)    |
| yPP011; GFP-NES                                                                                                                                                                                                                                                                                                      | Mata his3Δ1 leu2Δ0 met15Δ0<br>ura3Δ0 GFP-NES(pGal1)::His Nup49-<br>mCh::URA                                      | (Rempel et al.<br>2019)    |
| GFP collection <sup>2)</sup>                                                                                                                                                                                                                                                                                         | Mata his3Δ1 leu2Δ0 met15Δ0<br>ura3Δ0 <b>XX</b> -GFP::HIS3M X 6                                                   | ThermoFisher               |
| Nup116-GFPboundary                                                                                                                                                                                                                                                                                                   | Mata his3Δ1 leu2Δ0 met15Δ0<br>ura3Δ0                                                                             | (Rempel et al.<br>2019)    |
| yER016; Nup60-GFP <sup>1)</sup>                                                                                                                                                                                                                                                                                      | Mata leu2-3, 112 trp1-1 can1-100<br>ura3-1 ade 2-1 his3-11, 15 Nup60-<br>GFP::KanMX4                             | This paper                 |
| yIS010; Nup2-GFP Nup49mCherry                                                                                                                                                                                                                                                                                        | Mata his3Δ1 leu2Δ0 met15Δ0<br>ura3Δ0 Nup2-GFP::His3MX6 Nup49-<br>mCherry::URA                                    | (Rempel et al.<br>2019)    |
| yER020; Pab1-GFP                                                                                                                                                                                                                                                                                                     | Mata his3Δ1 leu2Δ0 met15Δ0<br>ura3Δ0 Pab1-GFP::HIS3M X 6                                                         | This paper                 |
| RFP localization database <sup>3)</sup>                                                                                                                                                                                                                                                                              | Mata his3Δ1 leu2Δ0 lys2Δ0 ura3Δ0<br><b>YY</b> -RFP::KanMX6                                                       | (Huh et al. 2003)          |
| SMY15                                                                                                                                                                                                                                                                                                                | Mata his3Δ1 leu2Δ0 met15Δ0<br>ura3Δ0 pTEF1-pHluorin::His3M X 6                                                   | (Mouton et al.<br>2020)    |
| SMY16                                                                                                                                                                                                                                                                                                                | Mata his3Δ1 leu2Δ0 met15Δ0<br>ura3Δ0 ATP sensor pTEF1-his6-<br>ymEGFP Δ11-B.subtilis ε-<br>ymScarletl::HIS3M X 6 | (Semmelink et al.<br>2022) |
| yER023; Kap122-GFP Nup133mCherry                                                                                                                                                                                                                                                                                     | Mata his3Δ1 leu2Δ0 met15Δ0<br>ura3Δ0 Kap122-GFP::HIS3M X 6<br>Nup133-mCherry::URA                                | This paper                 |
| <p>1) yER016 is in W303 background</p> <p>2) <b>XX</b> is: NSP1, Nup49, Nup100, Nup133, Nup159, Nup170, LSM4, Hsp104, ATP1, Get1, Vma1, Pma1, Tub1, Kap124, Kap95, Kap60, Kap122, Kap104, Kap142, Kap119, Kap121, Kap108, Kap109, Kap114, Kap120, Kap123.</p> <p>3) <b>YY</b> is: Anp1, Pex3, Nop56, Erg6, Snf7.</p> |                                                                                                                  |                            |

662

663 Table 3 Plasmids used in this publication.

| Plasmid number    | Genotype                        | Source                                |
|-------------------|---------------------------------|---------------------------------------|
| pPP008; MG5       | pUG34-Gal1-MBP-5XGFP-His        | (Popken et al. 2015)                  |
| pACM063; mCh-L-TM | pUG36-Gal-mCherry linker-TM-URA | (Meinema, Poolman, and Veenhoff 2013) |
| pYM28             | pAgTEF-SpHIS5-tAgTEF            | Euroscarf, Janke et al 2004           |
| pYM30             | pAgTEF-kanMX-tAgTEF             | Euroscarf, Janke et al 2004           |
| pPP014            | mCherry-Ura cassette            | (Rempel et al. 2019)                  |

664
